1 **Microcrystalline hydroxyapatite is not inferior to fluorides in clinical caries**  
2 **prevention: a randomized, double-blind, non-inferiority trial**

3 Ulrich Schlagenhauf<sup>1¶\*</sup>, Karl-Heinz Kunzelmann<sup>2¶</sup>, Christian Hannig<sup>3</sup>, Theodor W.  
4 May<sup>4</sup>, Helmut Hösl<sup>5</sup>, Mario Gratzka<sup>6</sup>, Gabriele Viergutz<sup>3</sup>, Marco Nazet<sup>7</sup>, Sebastian  
5 Schamberger<sup>8</sup>, Peter Proff<sup>5</sup>

6

7 <sup>1</sup> Department of Conservative Dentistry and Periodontology, University Hospital Wuerzburg,  
8 Wuerzburg, Germany

9

10 <sup>2</sup> Department of Conservative Dentistry and Periodontology, LMU Munich, Munich, Germany

11

12 <sup>3</sup> Clinic of Operative and Pediatric Dentistry, Medical Faculty Carl Gustav Carus, Technische  
13 Universität Dresden, Dresden, Germany

14

15 <sup>4</sup> Society for Biometry and Psychometry, Bielefeld, Germany

16

17 <sup>5</sup> Department of Orthodontics, University Hospital Regensburg, Regensburg, Germany

18

19 <sup>6</sup> Department of Orthodontics, University Hospital Wuerzburg, Wuerzburg, Germany

20

21 <sup>7</sup> Department of Orthodontics, LMU Munich, Munich, Germany

22

23 <sup>8</sup> Department of Orthodontics, Carolinum, Johann-Wolfgang-Goethe-University Frankfurt, Frankfurt,  
24 Germany

25

26

27 \* Corresponding author

28 E-mail: [schlagenha\\_u@ukw.de](mailto:schlagenha_u@ukw.de) (US)

29

30 ¶¶These authors contributed equally to this work.

31

32

33

34

## 35 **Abstract**

36 Recent evidence for a significant interference of microcrystalline hydroxapatite (HAP)  
37 particles with re- and demineralisation processes at the tooth-biofilm interface sug-  
38 gested, that they may be promising candidates for efficacious caries prevention.  
39 This multicenter randomized controlled non-inferiority trial evaluated the impact of the  
40 2 x daily use of a HAP dentifrice without fluoride on the progression of enamel caries  
41 in adolescent caries-risk patients subjected to orthodontic therapy, with a fluoridated  
42 AmF/SnF dentifrice serving as a positive control. Primary study outcome was the  
43 occurrence of enamel caries lesions  $\geq$  ICDAS (*International Caries Detection and*  
44 *Assessment System*) code 1 around orthodontic brackets on the vestibular surfaces  
45 of teeth 15-25 within the 168 days observation period. Secondary study outcomes  
46 were the occurrence of enamel caries lesion  $\geq$  ICDAS code 2, Plaque Index (PII) and  
47 Gingival Index (GI). Out of 150 recruited patients, 147 were included in the intent to  
48 treat analysis (ITT); 133 finished the study per protocol (PP). PP data analysis  
49 revealed the occurrence of enamel caries  $\geq$  ICDAS code 1 in 54.7% of the HAP  
50 group patients compared to 60.9% of the fluoride control. In the ITT analysis the  
51 corresponding numbers were 56.8% (HAP) and 61.6% (control). Non-inferiority  
52 testing of the ITT as well as the PP data set proved that the caries preventive efficacy  
53 of the HAP dentifrice was not inferior to the protection provided by the fluoridated  
54 AmF/SnF control. Regarding all assessed secondary outcomes (enamel caries  $\geq$   
55 ICDAS code 2, GI, PII) no significant differences between both experimental groups  
56 were observed. Within the restraints set by design and study population of this trial  
57 microcrystalline HAP as ingredient of toothpaste may thus be regarded a promising  
58 supplement to fluorides in clinical caries prevention (ClinicalTrials.gov:  
59 NCT02705456).

## 60 Introduction

61 In recent years findings, mostly derived from *in vitro* studies, suggested, that micro-  
62 crystalline hydroxyapatite (HAP) particles may be promising candidates for the  
63 prevention of cariogenic demineralization and the stimulation of remineralization  
64 processes on enamel and dentine surfaces [1-3]. Huang et al. (2011) reported a  
65 regain of mineral content and an increase in microhardness on demineralized bovine  
66 enamel slabs that had subsequently been exposed to microcrystalline HAP particles  
67 [2]. The observed increase in mineral content proved to be pH-dependent and was  
68 significantly higher under acidic conditions. Lin et al. (2014) discovered a significant  
69 inhibition of future demineralisation under acidic conditions after HAP application due  
70 to the formation of a protective HAP layer over the prism-prism sheath interfaces,  
71 where enamel dissolution usually is initiated [4]. In an *in situ* - study the use of a zinc-  
72 carbonate HAP microcluster-containing mouth rinse significantly reduced bacterial  
73 colonization on bovine enamel slabs worn intraorally by healthy volunteers [5].  
74 Hannig and Hannig (2010) put these *in situ* and *in vitro* findings into a more compre-  
75 hensive perspective by stating that already physiological tooth wear constantly  
76 releases HAP particles into the oral environment, which may subsequently interfere  
77 with de- and remineralisation processes as well as with the metabolism of the oral  
78 microbiota at the tooth-bacterial biofilm interface [6]. The impact of microcrystalline  
79 HAP as an ingredient of dentifrices has been positively evaluated in controlled clinical  
80 trials regarding dentinal hypersensitivity [7-10] and parameters of periodontal health  
81 [11]. Up to date, however, comparable data regarding the caries-preventive  
82 properties of HAP toothpastes are mostly missing. They are limited to positive  
83 findings from *in situ* studies on extracted teeth or standardized enamel and dentine  
84 specimen, being subjected to different toothpaste slurries and worn in between by

85 volunteers in intraoral appliances [12-15]. As orthodontic therapy with fixed  
86 appliances is known to be associated with an increased incidence of the overgrowth  
87 of a caries-promoting microbiota [16] and the development of white spot enamel  
88 caries lesions [17-19], this study aimed at the assessment of the caries-preventive  
89 impact of the regular use of a fluoride-free HAP dentifrice in this particular group of  
90 caries risk patients. Due to the abundant evidence for the caries preventive efficacy  
91 of fluorides [20, 21], clinical caries studies may no longer involve a true negative  
92 control for obvious ethical reasons. Thus a non-inferiority trial was conducted. The  
93 study hypothesis to be tested was, that, in terms of caries prevention, the regular use  
94 of the HAP test dentifrice is not inferior to the regular use of a fluoridated control with  
95 proven efficacy.

96

## 97 **Material and methods**

98 The investigation was designed as a multicenter, prospective, parallel group, two  
99 arm, double-blind, randomized clinical non-inferiority trial to be performed at the  
100 German study centers Wuerzburg (leading study center), Regensburg, Munich,  
101 Dresden and Frankfurt. The study protocol was prepared in accordance with the  
102 declaration of Helsinki and met the criteria of GCP. It was approved by the ethics  
103 committee of the University of Wuerzburg (file #184/13) on March 28<sup>th</sup>, 2013.  
104 Registering clinical trials was not yet generally regarded a mandatory prerequisite to  
105 be performed prior to study initiation in 2012 and 2013 during the planning phase of  
106 this investigation. Therefore, registration with ClinicalTrials.gov (identifier:  
107 NCT02705456) was performed late on February 25<sup>th</sup>, 2016 in the final phase of  
108 patient recruitment, which had started already more than 1 year earlier. The authors  
109 confirm that all ongoing and related trials for this drug/intervention are registered.

## 110 **Study design**

111 The design of the study is schematically depicted in Fig 1.

112

### 113 **Fig 1. Study Design**

114

115 At visit 1 (-4 to -28 days prior to baseline) patients scheduled for orthodontic therapy  
116 were screened for study eligibility. Those meeting it and giving informed consent  
117 were subsequently scheduled for the baseline visit 2 (day 0).

118 At visit 2 Plaque Index (PII) as well as Gingival Index (GI) scores were recorded from  
119 the vestibular surfaces of teeth 15 to 25 followed by professional tooth cleaning and

120 the subsequent assessment of the vestibular enamel surfaces of teeth 15 to 25

121 according to ICDAS II criteria. Afterwards orthodontic brackets were adhesively

122 mounted to the vestibular surfaces and any excess of adhesive resin was removed.

123 No sealants, fluoride varnishes or any other caries-preventive layers surrounding the

124 brackets were applied. Using a randomization list a supply of either the test dentifrice

125 or the control dentifrice, calculated to be adequate for 4 weeks of 2 x daily repeated

126 toothbrushing, as well as a standardized electric tooth brush (Oral-B Pulsar 35;

127 Procter & Gamble GmbH, Germany) to be used for the duration of the study, were

128 handed over to the study patients. The dosage of the assigned dentifrice (2 x daily a

129 streak of approx. 1 g) and the use of the electric tooth brush were practically

130 instructed and the patients informed, to bring back all assigned toothpaste tubes at

131 the next scheduled visit. At day 28 the sequence of recording PII, GI and ICDAS II

132 scores was repeated as described for visit 2. As an additional caries-preventive

133 measure, teeth 15-25 were disinfected with a topically applied 1% chlorhexidine

134 (CHX) gel. Toothpaste tubes supplied at visit 2 were taken back and a new supply for

135 the next 4 weeks handed over. At day 56 (visit 4) oral hygiene was reinstructed and

136 the cleaning/disinfection procedures as well as the return/handing over of the  
137 toothpaste supply performed as described before. At day 84 (visit 5) the recording of  
138 GI, PII and ICDAS II scores as well as cleaning and disinfection were repeated as  
139 described before. Next to a new supply of toothpaste also a new Pulsar 35 electric  
140 toothbrush was handed over. At day 112 (visit 6) and at day 140 (visit 7) procedures  
141 performed were identical to those at day 56 (visit 4). At day 168 (visit 8) the final  
142 assessment of PII, GI and ICDAS II scores as well as the return of the study  
143 dentifrices was conducted as described before. Furthermore, at each study visit  
144 patients were asked about the occurrence of important harms or unintended effects  
145 related or unrelated to the use of the study dentifrices.

146

## 147 **Study population**

148 The trial was performed in adolescents and young adults being scheduled for  
149 orthodontic therapy with fixed appliances.

150

151 *Inclusion criteria were:*

152 - age 11-25 yrs.

153 - scheduled orthodontic therapy with fixed appliances of at least 6 months duration

154 comprising the placement of orthodontic brackets on the vestibular surfaces of

155 teeth 15 - 25

156 - regular (2x daily) oral home care with toothbrush and toothpaste

157 - caries promoting salivary counts of mutans streptococci  $\geq 10^5$  CFU/ml, which were

158 determined using the CRT<sup>®</sup> bacteria test (Ivoclar Vivadent, Liechtenstein) [22].

159

160

161 *Exclusion criteria were:*

162 - untreated caries lesions of ICDAS code 3-6 on any tooth

163 - treated carious lesions of ICDAS code 3-6 on the vestibular surfaces

164 of teeth 15-25

165 - diseases or conditions interfering with the salivary flow or requiring the regular use

166 of medications interfering with it

167 - antibiotic therapy within the last 6 weeks before study participation or necessity for

168 antibiotic prophylaxis during dental interventions

169 - known allergies to ingredients of the experimental dentifrices

170

## 171 **Interventions - experimental dentifrices**

### 172 *a) Test Dentifrice*

173 The test dentifrice (Karex<sup>®</sup> Zahnpasta; Dr. Kurt Wolff GmbH & Co. KG, Germany)

174 was provided by the sponsor of the study. It contained 10% of microcrystalline HAP

175 as the main caries-preventive agent and also the following ingredients: Aqua,

176 glycerol, hydrogenated starch hydrolysate, xylitol, hydrated silica, Silica, aroma,

177 cellulose gum, sodium methyl cocoyl taurate, *Helianthus annuus* seed oil, polyglyceryl-

178 3 palmitate, polyglyceryl-6 caprylate, *Usnea barbata* extract.

179

### 180 *b) Control Dentifrice*

181 A commercially available fluoridated toothpaste (meridol<sup>®</sup> Zahnpasta; CP GABA

182 GmbH, Germany) was used as a positive control. It contained amine fluoride and

183 stannous fluoride in concentrations of 350 ppm and 1050 ppm, respectively, and

184 furthermore the following ingredients: Aqua, sorbitol, hydrated silica, silica dimethyl

185 silylate, hydroxyethylcellulose, PEG-40, hydrogenated castor oil, cocamidopropyl

186 betaine, aroma, sodium gluconate, PEG-3 tallow aminopropylamine, saccharin,  
187 hydrochloric acid, potassium hydroxide, CI 74160.

188

## 189 **Primary outcome**

190 The primary outcome was set to the percentage of subjects in each experimental  
191 group exhibiting the new occurrence of at least one enamel caries lesion of ICDAS  
192 code 2 or higher on any vestibular surface of the 10 evaluated teeth 15 to 25 during  
193 the observation period of 168 days.

## 194 **Assessment of carious lesions**

195 The occurrence of caries lesions was evaluated visually on the vestibular surfaces of  
196 teeth 15 to 25 according to the criteria of the *International Caries Detection and*  
197 *Assessment System* (ICDAS-II) [23]. The examination was performed at baseline,  
198 prior to the fixation of the orthodontic brackets, and was repeated 28 days, 84 days  
199 and 168 days later. All teeth were professionally cleaned before each assessment  
200 from any adhering bacterial biofilms or stains. The development of a caries lesion  
201 > ICDAS code 3 during the course of the study on any tooth and observed at any visit  
202 was defined as an immediate study exit criterion.

## 203 **Interexaminer reliability**

204 To ensure interexaminer reliability, prior to the study onset all examiners were  
205 instructed to pass the ICDAS e-learning course at the [icdas.org](http://icdas.org) website and were  
206 subsequently trained in person by an experienced expert (K.H.K.) to perform ICDAS  
207 assessments in reference patients. Grading skills were retrained 3 times during the  
208 course of the study using another internet-based ICDAS training tool. Similar to Luz  
209 et al. [24] it confronted the examiners with a random sample of 40 pictures of upper



210 premolars, canines and incisors with surface integrities ICDAS codes 0-3. 50% of  
211 the pictures of a given sample were randomly presented in duplicates to evaluate the  
212 ability of the examiners to reproduce their own assessments.  
213 Interrater reliability analysis revealed a mean weighted kappa = 0.75 for the first  
214 assessment run, which increased to kappa = 0.80 for the final calibration, indicating  
215 "substantial agreement" among the different examiners throughout the study [25].  
216 Although up to three examiners were trained and calibrated at each study center  
217 before the onset of the trial, at four centers the bulk of the practical evaluations was  
218 performed by a single principal examiner (Munich 100% of all visits, Frankfurt 100%,  
219 Regensburg 96 %, Wuerzburg 96 %) At the center in Dresden the principal examiner  
220 performed 58% of all examinations, the second examiner 38%.

221

## 222 **Secondary outcomes**

223 Secondary outcomes were plaque coverage and gingival inflammation at baseline  
224 and at day 168 evaluated by recording the  
225 - Plaque Index (PII) [26] and the  
226 - Gingival Index (GI) [27], respectively.

227

## 228 **Sample size calculation**

229 Based on a reported caries incidence rate of about 60% in a preceding caries trial  
230 assessing orthodontic patients with fixed braces, who were not being preselected  
231 for particular caries-promoting risk factors [18], the likelihood for the occurrence of an  
232 ICDAS code 2 lesion during the 168 day observation period in this cohort of caries-  
233 risk individuals with elevated salivary numbers of caries-promoting mutans  
234 streptococci was extrapolated to be p=80% for the control group using the fluoridated

235 toothpaste. The difference between both experimental groups not be regarded  
236 clinically relevant was set to  $\Delta \leq 20\%$ . A sample size of 2 x 74 study patients was  
237 calculated to be sufficient to reject the null hypothesis, that the test dentifrice is  
238 inferior to the control dentifrice, using a non-inferiority margin of  $\Delta = 20\%$  for the  
239 primary outcome measure and one-sided, exact Fisher Test ( $\alpha = 5\%$ , power = 80%).  
240

## 241 **Blinding, randomisation**

242 The trial was designed to blind study patients and examiners to the group assign-  
243 ment. For this purpose, both study dentifrices (test/control) were filled into neutral  
244 plastic tubes of identical shape and color by an independent, GMP certified  
245 laboratory for cosmetics. Using block randomization with a block size of 4 a random  
246 list was generated to code-label test and control tubes with consecutive unique  
247 identification numbers. Randomization of dentifrice assignment was stratified by  
248 study center. Handing out of the experimental dentifrices to the study patients  
249 followed the sequence of the identification numbers and was performed by trained  
250 study nurses not involved in the examination of the study participants. To maintain  
251 blinding of examiners and study patients, the study patients were instructed not to  
252 discuss toothpaste-related issues with the examiners but with the study nurses only,  
253 who were also responsible for instructing the patients in efficacious oral hygiene and  
254 taking back the empty or unused dentifrice tubes at the subsequent visits. The  
255 number of study nurses varied between a minimum of one and a maximum of four  
256 per study center.  
257

## 258 **Statistical analysis**

259 The primary outcome measure was analysed primarily for the PP population and  
260 repeated for sensitivity reasons, for the ITT population. The exact confidence limits  
261 (Clopper-Pearson) were computed to test non-inferiority (cp. [28]). For the primary  
262 outcome measure, non-inferiority was claimed, if the upper limit of the one-sided 95%  
263 confidence for the corresponding difference between test and control dentifrice was  
264 less than  $\Delta \leq 20\%$ .

265 In addition, two-sided Wilcoxon-Mann-Whitney tests were used for between group  
266 comparisons and Friedman tests for within group comparisons for secondary  
267 outcomes.

268 SAS<sup>®</sup> 9.3 software package (SAS Institute Inc., USA) was used for statistical  
269 evaluations.

270

## 271 **Patient Recruitment**

272 Out of a total of 281 screened individuals, 150 patients meeting the inclusion criteria  
273 gave written informed consent and were recruited at the study centers in Wuerzburg  
274 (n=36), Regensburg (n=72), Dresden (n=28), Munich (n=12) and Frankfurt (n=2). The  
275 first patient was included in the trial on November 13<sup>th</sup>, 2013, the last patient left the  
276 trial on August 28<sup>th</sup>, 2016. At the study centers Wuerzburg, Regensburg and Dresden  
277 not only center patients but also orthodontic patients being treated in private practice  
278 were included and assessed by the examiners of the center.

279

280

281

282

## 283 **Dropouts**

284 Six patients of the test group and 4 patients of the control group terminated study  
285 participation prematurely due to lack of interest or not keeping the follow-up appoint-  
286 ments. Further 6 patients completed the study but were excluded from the PP  
287 analysis due to insufficient dosing of the assigned dentifrice, calculated from the  
288 residual weight of the returned dentifrice tubes. All but one patient of the test group  
289 and all patients of the control group received at least one dose of the assigned  
290 dentifrice (n=149) and were thus primarily included in the ITT analysis set. As two  
291 study patients left the trial already before the first reevaluation at week 4, the total  
292 number of study individuals suitable for an inclusion in the ITT analysis of caries  
293 development further decreased to n=147. No important harms or unintended effects  
294 related or unrelated to the use of the study dentifrices were reported. Finally, a total  
295 of 133 study patients (64 test / 69 control) was included in the PP analysis set (Fig 2).

296

### 297 **Fig 2. CONSORT Flow Chart**

298

## 299 **Results**

### 300 *Health Status, Age, Gender*

301 All study patients were healthy. Mean age of the HAP test group patients was 13.4  
302 yrs  $\pm$  1.8 SD and 13.4 yrs  $\pm$  1.7 SD for the fluoride control group. 52.7% of the HAP  
303 test group and 62.2% of the fluoride control group patients were female.

304

### 305 *Blinded change of the primary outcome*

306 A blinded analysis of the ICDAS data at the end of the study revealed, that the  
307 overall observed occurrence of ICDAS lesions  $\geq$  code 2 in the study population was  
308 29.3% and therefore considerably lower than the anticipated value ( $p = 80\%$ ) used  
309 for the sample size calculation. As the difference between the groups not be  
310 regarded clinically relevant had been set in the study protocol to  $\Delta \leq 20\%$  a clinically  
311 meaningful verification of non-inferiority was no longer warranted. Thus, the primary  
312 endpoint was changed to the more frequent overall occurrence of ICDAS lesions  
313  $\geq$  code 1 (59.2%). It was decided to keep the original primary endpoint as an  
314 additional secondary outcome in the statistical data analysis.

315

#### 316 *Occurrence of ICDAS lesions $\geq$ code 1 and $\geq$ code 2*

317 The occurrence of ICDAS lesions  $\geq$  code 1 (revised primary outcome) and ICDAS  
318 lesions  $\geq$  code 2 (secondary outcome) is depicted in table 1. In the PP analysis  
319 54.7% of the HAP group patients ( $n=35$ ) and 60.9% of the fluoride control group  
320 patients ( $n=42$ ) showed the formation of at least one ICDAS lesion  $\geq$  code 1 during  
321 the 168 day observation period. In the ITT analysis the corresponding numbers were  
322 56.8% for the patients of the HAP group ( $n=42$ ) and 61.9% for those of the fluoride  
323 control ( $n=45$ ). In the PP data set the occurrence of at least one ICDAS lesion  $\geq$  code  
324 2 was observed in 23.4% of the patients of the HAP group compared to 34.8% of the  
325 fluoride controls. In the ITT data set the the corresponding numbers were 25.7% of  
326 the HAP group and 32.9% of the fluoride controls. Differences between the groups  
327 could not be verified statistically for both analysis sets.

328

329

330

331 **Table 1. Occurrence of ICDAS lesions  $\geq$  code 1 and  $\geq$  code 2 within the**  
 332 **168 days observation period (ITT and PP analysis)**

333

| Treatment Group | ICDAS lesion                     | per protocol (PP) analysis |    |    | intent to treat (ITT) analysis |    |    |
|-----------------|----------------------------------|----------------------------|----|----|--------------------------------|----|----|
|                 |                                  | %                          | n  | N  | %                              | n  | N  |
| HAP test        | ICDAS code $\geq$ 1 <sup>a</sup> | 54.7                       | 35 | 64 | 56.8                           | 42 | 74 |
| AmF/SnF control | ICDAS code $\geq$ 1 <sup>a</sup> | 60.9                       | 42 | 69 | 61.6                           | 45 | 73 |
| HAP test        | ICDAS code $\geq$ 2              | 23.4                       | 15 | 64 | 25.7                           | 19 | 74 |
| AmF/SnF control | ICDAS code $\geq$ 2              | 34.8                       | 24 | 69 | 32.9                           | 24 | 73 |

334 <sup>a</sup> primary outcome measure; n, number of patients with ICDAS lesions  $\geq$  code 1 and  $\geq$  code 2;  
 335 N, number of patients in corresponding treatment group

336

337

338 *Non-inferiority analysis*

339 Table 2 displays the difference between both experimental groups regarding the  
 340 percentage of study subjects experiencing the new occurrence of at least one ICDAS  
 341 lesion  $\geq$  code 1 (primary outcome) or at least one ICDAS lesion  $\geq$  code 2 (secondary  
 342 outcome) including the corresponding one-sided 95% confidence intervals. As the  
 343 upper limits of the 95% confidence intervals for the primary outcome are well below  
 344 the given non-inferiority margin of  $\Delta \leq 20\%$  for both analysis sets (PP: 8%; ITT: 9%)  
 345 the HAP group has to be considered as non-inferior to the fluoride control.  
 346 Also regarding the secondary outcome (ICDAS lesion  $\geq$  code 2) the upper limits of  
 347 the 95% confidence intervals are substantially below the given non-inferiority margin  
 348 of 20% for both analysis sets (PP: 3%, ITT: 7%), indicating that again the HAP test  
 349 group has to be considered being non-inferior to the fluoridated control.

350

351

352

353 **Table 2. Difference between both experimental groups regarding the**  
 354 **occurrence of ICDAS lesions  $\geq$  code 1 and  $\geq$  code 2 within the 168 days**  
 355 **observation period (95% one-sided confidence intervals)**

| Analysis     | ICDAS lesion                     | Proportion in risk difference | Exact lower one-sided 95% confidence limit | Exact upper one-sided 95% confidence limit <sup>b</sup> |
|--------------|----------------------------------|-------------------------------|--------------------------------------------|---------------------------------------------------------|
| PP analysis  | ICDAS code $\geq$ 1 <sup>a</sup> | -0.062                        | -0.203                                     | 0.083                                                   |
| ITT analysis | ICDAS code $\geq$ 1 <sup>a</sup> | -0.048                        | -0.188                                     | 0.087                                                   |
| PP analysis  | ICDAS code $\geq$ 2              | -0.114                        | -0.255                                     | 0.030                                                   |
| ITT analysis | ICDAS code $\geq$ 2              | -0.072                        | -0.202                                     | 0.068                                                   |

357 <sup>a</sup> primary outcome measure; <sup>b</sup> the upper one-sided 95% confidence limit is markedly lower than the  
 358 non-inferiority margin of 0.20 ( $\Delta = 20\%$ ) thus inferiority is rejected.

360 *Effect of study site on the primary outcome measure*

361 The effect of study site on the primary outcome measure  $\Delta$ ICDAS score  $\geq$  1 at week  
 362 24 was evaluated by logistic regression analysis. It included the factors study site,  
 363 treatment group and the interaction between study site and treatment group. Due to  
 364 small sample sizes, the data for the study sites Dresden, Munich and Frankfurt were  
 365 pooled (n=40 patients). The results revealed a significantly lower incidence of the  
 366 primary outcome at week 24 ( $p < 0.001$ ) at the combined smaller centers (Dresden,  
 367 Munich, Frankfurt) when compared to the study centers in Regensburg (n=72  
 368 patients) or Wuerzburg (n=35 patients). However, there was no significant interaction  
 369 between study site and treatment group, proving that the factor study site did not  
 370 significantly affect efficacy differences between the treatment groups (for further  
 371 informations see also Appendix 1).

373 *Number and severity of ICDAS score increases*

374  
 375 The number and severity of ICDAS score increases on the vestibular surfaces of  
 376 teeth 15-25 over the course of the study are shown in table 3. At week 4 3.2% of the  
 377 teeth in the HAP group were already affected (ICDAS code 1: 3.0%; ICDAS code 2:

378 0.2%) compared to 3.6% of the AmF/SnF control group (ICDAS code 1: 3.1%;  
379 ICDAS code 2: 0.5%). These figures steadily increased over time. At week 24  
380 19.6% of the teeth in the HAP group were affected (ICDAS code 1: 14.8%; ICDAS  
381 code 2: 4.8%) compared to 21.0% in the AmF/SnF control group (ICDAS code 1:  
382 14.2%; ICDAS code 2: 6.7%; ICDAS code 3: 0.1%).  
383  
384



385  
386  
387

**Table 3. Number and severity of ICDAS score increases observed on teeth 15-25 at week 4, week 12 and week 24 (PP data set; n=133)**

|         |                | HAP<br>test group |       | AmF/SnF<br>control group |       | Total      |       |
|---------|----------------|-------------------|-------|--------------------------|-------|------------|-------|
| Visit   | Δ ICDAS        | n<br>teeth        | %     | n<br>teeth               | %     | n<br>teeth | %     |
| week 4  | No increase    | 620               | 96.9  | 665                      | 96.4  | 1285       | 96.6  |
|         | Δ ICDAS code 1 | 19                | 3.0   | 24                       | 3.5   | 43         | 3.2   |
|         | Δ ICDAS code 2 | 1                 | 0.2   | 1                        | 0.1   | 2          | 0.2   |
|         | <b>Total</b>   | 640               | 100.0 | 690                      | 100.0 | 1330       | 100.0 |
| week 12 | No increase    | 573               | 89.5  | 611                      | 88.6  | 1184       | 89.0  |
|         | Δ ICDAS code 1 | 58                | 9.1   | 59                       | 8.6   | 117        | 8.8   |
|         | Δ ICDAS code 2 | 9                 | 1.4   | 20                       | 2.9   | 29         | 2.2   |
|         | <b>Total</b>   | 640               | 100.0 | 690                      | 100.0 | 1330       | 100.0 |
| week 24 | No increase    | 514               | 80.3  | 545                      | 79.0  | 1059       | 79.6  |
|         | Δ ICDAS code 1 | 95                | 14.8  | 98                       | 14.2  | 193        | 14.5  |
|         | Δ ICDAS code 2 | 31                | 4.8   | 46                       | 6.7   | 77         | 5.8   |
|         | Δ ICDAS code 3 | 0                 | 0     | 1                        | 0.1   | 1          | 0.1   |
|         | <b>Total</b>   | 640               | 100.0 | 690                      | 100.0 | 1330       | 100.0 |

388

389

390 *Plaque Index (PII), Gingival Index (GI)*

391 The results of the ITT analysis of the PII and the GI data are shown in Table 4. Mean  
392 PII as well as mean GI scores increased significantly ( $p < 0.0001$ ) between baseline  
393 and day 168 in both groups. Neither at baseline nor at day 168 differences between  
394 the experimental groups were statistically significant.

395  
396  
397

398  
399  
400

**Table 4. Plaque Index and Gingival Index scores at baseline, day 28, day 84 and day 168 (ITT analysis)**

| Plaque Index (PII)    |                |                   |      |                       |                   |      |
|-----------------------|----------------|-------------------|------|-----------------------|-------------------|------|
|                       | HAP test group |                   |      | AmF/SnF control group |                   |      |
| Visit                 | N              | mean <sup>a</sup> | SD   | N                     | mean <sup>a</sup> | SD   |
| baseline <sup>b</sup> | 75             | 0.35              | 0.37 | 74                    | 0.36              | 0.36 |
| week 4                | 74             | 0.65              | 0.58 | 72                    | 0.76              | 0.56 |
| week 12               | 74             | 0.72              | 0.60 | 73                    | 0.75              | 0.61 |
| week 24 <sup>b</sup>  | 74             | 0.85              | 0.66 | 73                    | 0.77              | 0.61 |
| Gingival Index (GI)   |                |                   |      |                       |                   |      |
|                       | HAP test group |                   |      | AmF/SnF control group |                   |      |
| Visit                 | N              | mean <sup>a</sup> | SD   | N                     | mean <sup>a</sup> | SD   |
| baseline <sup>b</sup> | 75             | 0.29              | 0.36 | 74                    | 0.37              | 0.41 |
| week 4                | 74             | 0.53              | 0.57 | 73                    | 0.58              | 0.54 |
| week 12               | 74             | 0.51              | 0.53 | 73                    | 0.66              | 0.55 |
| week 24 <sup>b</sup>  | 74             | 0.70              | 0.56 | 73                    | 0.77              | 0.59 |

401  
402  
403  
404  
405  
406

<sup>a</sup> significant ( $p < 0.0001$ ) increase of Plaque Index and Gingival Index over time from baseline to day 168 for both treatment groups (Friedman test)

<sup>b</sup> no significant differences between both treatment groups at baseline and at day 168 (two-sided Wilcoxon-Mann-Whitney test)

## 407 **Discussion**

### 408 **Methods**

409 Caries detection and grading in this trial followed the principles of ICDAS-II [23], an  
410 internationally established, state of the art caries assessment method, which is  
411 particularly suitable and appropriate for the differentiation and grading of incipient  
412 enamel caries development, allowing to verify even minor differences in the efficacy  
413 of caries-preventive measures. As described before, repeated examiner calibration  
414 by an internet-based ICDAS training tools as well as personal examiner calibrations  
415 by an experienced ICDAS grading expert (K.H.K.) were integral parts of the study  
416 design, to warrant the validity of the clinical recordings. Mean weighted kappa for  
417 interrater reliability increased from 0.75 for the first to 0.80 for the final calibration  
418 assessment. This was overall in the upper range of kappa reliability scores reported  
419 by other controlled clinical trials and indicated "substantial" agreement [25]. It  
420 assured that the assessment of the primary study outcome was based on a sound  
421 foundation. Furthermore, all examiners were blinded to the dentifrice allocation of the  
422 study subjects throughout the course of the study to avoid any possible examiner  
423 bias.

424

### 425 **Study population**

426 The assessed study patients, wearing fixed orthodontic appliances, were without  
427 doubt caries-active, documented by the considerable increase in enamel caries  
428 lesions during the 168 days observation period, which was comparable in its  
429 magnitude to observations made by other clinical trials [18, 29]. Due to the inevitable  
430 lack of a negative control group for ethical reasons, it is however very difficult to  
431 assess the true extent of caries prevention provided by the regular use of both

432 dentifrices to the study participants. It may be argued, that in the chosen setting of  
433 caries-active orthodontic patients overly acidic conditions beyond the remineralizing  
434 capacities of fluorides and hydroxyapatite particles might have rendered a  
435 meaningful non-inferiority analysis impossible. We cannot share, however, this  
436 assumption for the following reasons: In a more recent multicenter caries trial by  
437 Sonesson et al. (2014), assessing a comparable cohort of 424 adolescent patients  
438 age 12-16 subjected to orthodontic therapy with fixed appliances, the regular use of a  
439 highly concentrated 5000 ppm fluoride dentifrice was accompanied by a significantly  
440 lower incidence of white spot enamel lesions when compared to the regular use of a  
441 standard 1450 ppm fluoride control dentifrice [30]. While this suggests, that 1450  
442 ppm may not be the optimal fluoride concentration for a dentifrice to be used in  
443 caries-active orthodontic patients, it evidently contradicts the assumption, that in  
444 these patients the caries-preventive efficacy of fluoride is completely blocked by  
445 overly acidic conditions. On the contrary, Sonesson et al. even speculated, that the  
446 reduced increase in enamel caries observed for the use of the 5000 ppm fluoride  
447 dentifrice may be attributable to a dose-dependent inhibitory effect of fluorides on *in*  
448 *vivo* lactate production in supragingival bacterial biofilms as discovered by Takahasi  
449 and Washio (2012) [31]. The findings by Sonesson et al. are also in line with the  
450 conclusions of two meta-reviews assessing the efficacy of topical fluorides in  
451 orthodontic patients subjected to therapy with fixed braces, which advocated the  
452 additional use of fluoride rinses or varnishes as a complement to regular  
453 toothbrushing with fluoride dentifrices [17, 32]. From a clinician's point of view the  
454 caries protection provided by the sole use of both dentifrices evaluated in the present  
455 trial may not have been sufficient for a sizeable part of the study participants. This  
456 may however not be interpreted as an inherent and complete lack of clinical efficacy.  
457 It rather reflects the fact, that the study population deliberately and in accordance

458 with the recommendations of the 2004 International Consensus Workshop on caries  
459 clinical trials [33], included many subjects with a very high caries activity. While this is  
460 a condition, which clinically may only be partially controllable by the sole use of  
461 conventional fluoride toothpaste not exceeding the legal fluoride concentrations limits  
462 for cosmetic products, as described before, the inclusion of highly caries-active  
463 individuals in a controlled caries prevention trial is an indispensable prerequisite for a  
464 meaningful verification of possible differences regarding the caries-protecting  
465 capacities of evaluated products or interventions [33] .

466

#### 467 Data Analysis

468 Whether the occurrence frequency of ICDAS code 1 enamel caries lesions used in  
469 this study is the most suitable primary endpoint for a non-inferiority caries trial may  
470 be subject to discussion. However, the adjunctive analysis of the PP data set  
471 regarding frequency and severity of the occurrence of enamel caries lesions during  
472 the observation period depicted in table 3 only confirms the identified absence of  
473 relevant differences between both experimental groups. It may also have been  
474 debatable to keep the original non-inferiority margin of  $\Delta = 20\%$  when switching the  
475 primary outcome of the trial despite an overall incidence of the revised primary  
476 outcome (ICDAS lesion code 1) of only 60%. The subsequent analysis of the  
477 unblinded PP data set however revealed, that the actual difference between both  
478 experimental groups was 6.2% in favour of the HAP test dentifrice with an exact  
479 upper one-sided 95% confidence limit of 8.3%, i.e. substantially lower than the preset  
480 non-inferiority margin of  $\Delta = 20\%$ .

#### 481 Secondary Outcomes

482 The data for the secondary outcomes Plaque Index (PII) and Gingival Index (GI)  
483 furthermore confirmed the findings of preceding studies, reporting a significant

484 increase of gingival inflammation and bacterial plaque mass after the onset of  
485 orthodontic therapy with fixed appliances [18, 29]. Differences between both  
486 experimental groups regarding the recorded PII and GI data could not be verified  
487 statistically for any of the evaluated time points, which is also in good agreement with  
488 the results of a previous trial comparing the plaque- and gingivitis-reducing properties  
489 of a fluoride-free HAP test dentifrice and a fluoridated AmF/SnF control in a study  
490 cohort of periodontitis patients [11].

#### 491 Outlook

492 While the safety of fluoride-based caries prevention has been firmly established by  
493 numerous studies [21], dosage and toxicity aspects have always to be considered.  
494 This particularly limits the clinical feasibility of the aforementioned increase in fluoride  
495 dosing in high caries-risk infants and children up to an age of 8 due to the  
496 associated risk for the development of dental fluorosis. Although not verified by  
497 clinical studies so far, increasing the dosing or application frequency of HAP  
498 toothpaste might also have a beneficial impact on clinical outcome in highly caries  
499 active subjects because HAP is a potent buffer, able to neutralize organic acids in a  
500 dose-dependent manner. By contrast to fluorides, increasing the applied dosage of  
501 HAP particles is virtually free of any toxicity issues even in infants and children, as  
502 HAP is the major mineral phase of all hard tissues within the human body [6].

503

#### 504 **Conclusions**

505 Regular toothbrushing with a fluoride-free microcrystalline hydroxyapatite-containing  
506 dentifrice is a viable method of clinical caries control. The proof of non-inferiority in  
507 comparison to the regular use of a conventional fluoride dentifrice verified by this  
508 trial in a cohort of caries-active adolescents and adults may however be only a first  
509 step. The promising results revealed by the present study need to be corroborated by

510 subsequent clinical investigations in a broader spectrum of study populations and  
511 diverging caries activities before general conclusions regarding the benefits and  
512 limits of microcrystalline HAP in clinical caries prevention may be possible.

513

## 514 **Acknowledgements**

515 The contract research organisation FGK Clinical Research GmbH, Germany  
516 performed the statistical analyses. The statistical analyses, including sample size  
517 calculation, were planned by the Society for Biometry and Psychometry, Bielefeld,  
518 Germany in cooperation with the principal investigator of the study.

519

520

521

522

523

524

## 525 **References**

- 526 1. Hornby K, Evans M, Long M, Joiner A, Laucello M, Salvaderi A. Enamel benefits of  
527 a new hydroxyapatite containing fluoride toothpaste. *Int Dent J* 2009;59:325–31.  
528
- 529 2. Huang S, Gao S, Cheng L, Yu H. Remineralization potential of nano-hydroxyapa-  
530 tite on initial enamel lesions: an in vitro study. *Caries research*. 2011;45(5):460-8.  
531 doi: 10.1159/000331207. PubMed PMID: 21894006.  
532
- 533 3. Huang SB, Gao SS, Yu HY. Effect of nano-hydroxyapatite concentration on  
534 remineralization of initial enamel lesion in vitro. *Biomedical materials*.  
535 2009;4(3):034104. doi: 10.1088/1748-6041/4/3/034104. PubMed PMID: 19498220.  
536
- 537 4. Lin K, Wu C, Chang J. Advances in synthesis of calcium phosphate crystals with  
538 controlled size and shape. *Acta biomaterialia*. 2014;10(10):4071-102. doi:  
539 10.1016/j.actbio.2014.06.017. PubMed PMID: 24954909.  
540
- 541 5. Kensche A, Holder C, Basche S, Tahan N, Hannig C, Hannig M. Efficacy of a mouthrinse  
542 based on hydroxyapatite to reduce initial bacterial colonisation in situ.  
543 *Archives of oral biology*. 2017 Mar 23;80:18-26. PubMed PMID: 28364672.  
544
- 545 6. Hannig C, Hannig M. Natural enamel wear--a physiological source of hydroxyl-  
546 apatite nanoparticles for biofilm management and tooth repair? *Medical hypotheses*.  
547 2010;74(4):670-2. doi: 10.1016/j.mehy.2009.11.007. PubMed PMID: 19962245.  
548
- 549 7. Wang L, Magalhaes AC, Francisconi-Dos-Rios LF, Calabria MP, Araujo D, Buzalaf  
550 M, et al. Treatment of Dentin Hypersensitivity Using Nano-Hydroxyapatite Pastes: A  
551 Randomized Three-Month Clinical Trial. *Operative dentistry*. 2016;41(4):E93-E101.  
552 doi: 10.2341/15-145-C. PubMed PMID: 26919080.  
553
- 554 8. Vano M, Derchi G, Barone A, Covani U. Effectiveness of nano-hydroxyapatite  
555 toothpaste in reducing dentin hypersensitivity: a double-blind randomized controlled  
556 trial. *Quintessence international*. 2014;45(8):703-11. doi: 10.3290/j.qi.a32240.  
557 PubMed PMID: 25019114.  
558
- 559 9. Orsini G, Procaccini M, Manzoli L, Giuliadori F, Lorenzini A, Putignano A. A double-  
560 blind randomized-controlled trial comparing the desensitizing efficacy of a new  
561 dentifrice containing carbonate/hydroxyapatite nanocrystals and a sodium  
562 fluoride/potassium nitrate dentifrice. *Journal of clinical periodontology*. 2010; 37(6):  
563 510-7. doi: 10.1111/j.1600-051X.2010.01558.x. PubMed PMID: 20507374.  
564
- 565 10. Gopinath NM, John J, Nagappan N, Prabhu S, Kumar ES. Evaluation of Denti-  
566 frice Containing Nano-hydroxyapatite for Dentinal Hypersensitivity: A Randomized  
567 Controlled Trial. *Journal of international oral health: JIOH*. 2015;7(8):118-22. PubMed  
568 PMID: 26464553; PubMed Central PMCID: PMC4588776.  
569
- 570
- 571 11. Harks I, Jockel-Schneider Y, Schlagenhaut U, May TW, Gravemeier M, Prior K,  
572 et al. Impact of the Daily Use of a Microcrystal Hydroxyapatite Dentifrice on De Novo  
573 Plaque Formation and Clinical/Microbiological Parameters of Periodontal Health. A



- 574 Randomized Trial. PloS one. 2016;11(7):e0160142. doi: 10.1371/  
575 journal.pone.0160142. PubMed PMID: 27467683; PubMed Central PMCID:  
576 PMC4965058.
- 577
- 578 12. Souza BM, Comar LP, Vertuan M, Fernandes Neto C, Buzalaf MA, Magalhaes  
579 AC. Effect of an Experimental Paste with Hydroxyapatite Nanoparticles and Fluoride  
580 on Dental Demineralisation and Remineralisation in situ. Caries research.  
581 2015;49(5):499-507. doi: 10.1159/000438466. PubMed PMID: 26278685.  
582
- 583 13. Lelli M, Putignano A, Marchetti M, Foltran I, Mangani F, Procaccini M, et al.  
584 Remineralization and repair of enamel surface by biomimetic Zn-carbonate  
585 hydroxyapatite containing toothpaste: a comparative in vivo study. Frontiers in  
586 physiology. 2014;5:333. doi: 10.3389/fphys.2014.00333. PubMed PMID: 25249980;  
587 PubMed Central PMCID: PMC4155874.  
588
- 589 14. Najibfard K, Ramalingam K, Chedjieu I, Amaechi BT. Remineralization of early  
590 caries by a nano-hydroxyapatite dentifrice. The Journal of clinical dentistry.  
591 2011;22(5):139-43. PubMed PMID: 22403978.  
592
- 593 15. Esteves-Oliveira M, Santos NM, Meyer-Lueckel H, Wierichs RJ, Rodrigues JA.  
594 Caries-preventive effect of anti-erosive and nano-hydroxyapatite-containing  
595 toothpastes in vitro. Clinical oral investigations. 2017;21(1):291-300. doi:  
596 10.1007/s00784-016-1789-0. PubMed PMID: 26993660.  
597
- 598 16. Attin R, Thon C, Schlagenhauf U, Werner C, Wiegand A, Hannig C, et al.  
599 Recolonization of mutans streptococci on teeth with orthodontic appliances after  
600 antimicrobial therapy. European journal of orthodontics. 2005;27(5):489-93. doi:  
601 10.1093/ejo/cji018. PubMed PMID: 15961573.  
602
- 603 17. Benson PE, Parkin N, Dyer F, Millett DT, Furness S, Germain P. Fluorides for the  
604 prevention of early tooth decay (demineralised white lesions) during fixed brace  
605 treatment. The Cochrane database of systematic reviews. 2013;(12):CD003809. doi:  
606 10.1002/14651858.CD003809.pub3. PubMed PMID: 24338792.  
607
- 608 18. Enaia M, Bock N, Ruf S. White-spot lesions during multibracket appliance  
609 treatment: A challenge for clinical excellence. American journal of orthodontics and  
610 dentofacial orthopedics : official publication of the American Association of  
611 Orthodontists, its constituent societies, and the American Board of Orthodontics.  
612 2011;140(1):e17-24. doi: 10.1016/j.ajodo.2010.12.016. PubMed PMID: 21724067.  
613
- 614 19. Martignon S, Ekstrand KR, Lemos MI, Lozano MP, Higuera C. Plaque, caries  
615 level and oral hygiene habits in young patients receiving orthodontic treatment.  
616 Community dental health. 2010;27(3):133-8. PubMed PMID: 21046903.  
617
- 618
- 619
- 620 20. Marinho VC, Higgins JP, Logan S, Sheiham A. Topical fluoride (toothpastes,  
621 mouthrinses, gels or varnishes) for preventing dental caries in children and  
622 adolescents. The Cochrane database of systematic reviews. 2003;(4):CD002782.  
623 doi: 10.1002/14651858.CD002782. PubMed PMID: 14583954.  
624

- 625 21. O'Mullane DM, Baez RJ, Jones S, Lennon MA, Petersen PE, Rugg-Gunn AJ, et  
626 al. Fluoride and Oral Health. *Community dental health*. 2016;33(2):69-99. PubMed  
627 PMID: 27352462.  
628
- 629 22. Mummolo S, Marchetti E, Giuca MR, Gallusi G, Tecco S, Gatto R, et al. In-office  
630 bacteria test for a microbial monitoring during the conventional and self-ligating  
631 orthodontic treatment. *Head & face medicine*. 2013;9:7. doi: 10.1186/1746-160X-9-7.  
632 PubMed PMID: 23375053; PubMed Central PMCID: PMC3563582.  
633
- 634 23. Ismail AI, Sohn W, Tellez M, Amaya A, Sen A, Hasson H, et al. The International Caries  
635 Detection and Assessment System (ICDAS): an integrated system for measuring dental  
636 caries. *Community dentistry and oral epidemiology*. 2007 Jun;35(3):170-8. PubMed PMID:  
637 17518963.  
638
- 639 24. Luz PB, Stringhini CH, Otto BR, Port AL, Zaleski V, Oliveira RS, et al.  
640 Performance of undergraduate dental students on ICDAS clinical caries detection  
641 after different learning strategies. *European journal of dental education : official  
642 journal of the Association for Dental Education in Europe*. 2015;19(4):235-41. doi:  
643 10.1111/eje.12131. PubMed PMID: 25495379.  
644
- 645 25. Hallgren KA. Computing Inter-Rater Reliability for Observational Data: An  
646 Overview and Tutorial. *Tutorials in quantitative methods for psychology*.  
647 2012;8(1):23-34. PubMed PMID: 22833776; PubMed Central PMCID: PMC3402032.  
648
- 649 26. Silness J, Loe H. Periodontal Disease in Pregnancy. II. Correlation between Oral  
650 Hygiene and Periodontal Condition. *Acta odontologica Scandinavica*. 1964;22:121-  
651 35. PubMed PMID: 14158464.  
652
- 653 27. Lobene RR, Weatherford T, Ross NM, Lamm RA, Menaker L. A modified gingival  
654 index for use in clinical trials. *Clinical preventive dentistry*. 1986;8(1):3-6. PubMed  
655 PMID: 3485495.  
656
- 657 28. Piaggio G, Elbourne DR, Pocock SJ, Evans SJ, Altman DG, Group C. Reporting  
658 of noninferiority and equivalence randomized trials: extension of the CONSORT 2010  
659 statement. *Jama*. 2012;308(24):2594-604. doi: 10.1001/jama.2012.87802. PubMed  
660 PMID: 23268518.  
661
- 662 29. Kirschneck C, Christl JJ, Reicheneder C, Proff P. Efficacy of fluoride varnish for  
663 preventing white spot lesions and gingivitis during orthodontic treatment with fixed  
664 appliances-a prospective randomized controlled trial. *Clinical oral investigations*.  
665 2016;20(9):2371-8. doi: 10.1007/s00784-016-1730-6. PubMed PMID: 26832780.  
666  
667
- 668 30. Sonesson M, Twetman S, Bondemark L. Effectiveness of high-fluoride toothpaste  
669 on enamel demineralization during orthodontic treatment-a multicenter randomized  
670 controlled trial. *European journal of orthodontics*. 2014 Dec;36(6):678-82. PubMed  
671 PMID: 24375756.  
672
- 673 31. Takahashi N, Washio J. Metabolomic effects of xylitol and fluoride on plaque  
674 biofilm in vivo. *Journal of dental research*. 2011 Dec;90(12):1463-8. PubMed PMID:

675 21940519. Pubmed Central PMCID: 4077520.

676

677 32. Chadwick BL, Roy J, Knox J, Treasure ET. The effect of topical fluorides on  
678 decalcification in patients with fixed orthodontic appliances: a systematic review.  
679 American journal of orthodontics and dentofacial orthopedics : official publication of  
680 the American Association of Orthodontists, its constituent societies, and the  
681 American Board of Orthodontics. 2005 Nov;128(5):601-6; quiz 70. PubMed PMID:  
682 16286207.

683

684 33. Pitts NB, Stamm JW. International Consensus Workshop on Caries Clinical Trials  
685 (ICW-CCT)--final consensus statements: agreeing where the evidence leads. Journal  
686 of dental research. 2004;83 Spec No C:C125-8. PubMed PMID: 15286139.

687

688

Screening Visit 1 (Day -4 – -28)

Baseline Visit 2 (Day 0)  
ICDAS, GI, PII  
Fixation of Orthodontic Brackets  
Randomized handing over of experimental dentifrice

**hydroxyapatite  
test dentifrice**

Visit 3 (Day 28)  
ICDAS, GI, PII  
CHX-disinfection  
supply of dentifrice

Visit 4 (Day 56)  
CHX-disinfection  
supply of dentifrice

Visit 5 (Day 84)  
ICDAS, GI, PII  
CHX-disinfection  
supply of dentifrice

Visit 6 (Day 122)  
CHX-disinfection  
supply of dentifrice

Visit 7 (Day 140)  
CHX-disinfection  
supply of dentifrice

**fluoridated AmF/SnF  
control dentifrice**

Visit 3 (Day 28)  
ICDAS, GI, PII  
CHX-disinfection  
supply of dentifrice

Visit 4 (Day 56)  
CHX-disinfection  
supply of dentifrice

Visit 5 (Day 84)  
ICDAS, GI, PII  
CHX-disinfection  
supply of dentifrice

Visit 6 (Day 122)  
CHX-disinfection  
supply of dentifrice

Visit 7 (Day 140)  
CHX-disinfection  
supply of dentifrice

Visit 8 Final Visit (Day 168)  
ICDAS, GI, PII  
Return of assigned dentifrice

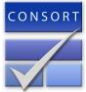

# CONSORT 2010 checklist of information to include when reporting a randomised trial\*

| Section/Topic                    | Item No | Checklist item                                                                                                                                                                              | Reported on page No |
|----------------------------------|---------|---------------------------------------------------------------------------------------------------------------------------------------------------------------------------------------------|---------------------|
| <b>Title and abstract</b>        |         |                                                                                                                                                                                             |                     |
|                                  | 1a      | Identification as a randomised trial in the title                                                                                                                                           | 1                   |
|                                  | 1b      | Structured summary of trial design, methods, results, and conclusions (for specific guidance see CONSORT for abstracts)                                                                     | 2                   |
| <b>Introduction</b>              |         |                                                                                                                                                                                             |                     |
| Background and objectives        | 2a      | Scientific background and explanation of rationale                                                                                                                                          | 3-4                 |
|                                  | 2b      | Specific objectives or hypotheses                                                                                                                                                           | 4                   |
| <b>Methods</b>                   |         |                                                                                                                                                                                             |                     |
| Trial design                     | 3a      | Description of trial design (such as parallel, factorial) including allocation ratio                                                                                                        | 4                   |
|                                  | 3b      | Important changes to methods after trial commencement (such as eligibility criteria), with reasons                                                                                          | -                   |
| Participants                     | 4a      | Eligibility criteria for participants                                                                                                                                                       | 6-7                 |
|                                  | 4b      | Settings and locations where the data were collected                                                                                                                                        | 11                  |
| Interventions                    | 5       | The interventions for each group with sufficient details to allow replication, including how and when they were actually administered                                                       | 5-6                 |
| Outcomes                         | 6a      | Completely defined pre-specified primary and secondary outcome measures, including how and when they were assessed                                                                          | 8-9                 |
|                                  | 6b      | Any changes to trial outcomes after the trial commenced, with reasons                                                                                                                       | 12                  |
| Sample size                      | 7a      | How sample size was determined                                                                                                                                                              | 9                   |
|                                  | 7b      | When applicable, explanation of any interim analyses and stopping guidelines                                                                                                                | -                   |
| <b>Randomisation:</b>            |         |                                                                                                                                                                                             |                     |
| Sequence generation              | 8a      | Method used to generate the random allocation sequence                                                                                                                                      | 10                  |
|                                  | 8b      | Type of randomisation; details of any restriction (such as blocking and block size)                                                                                                         | 10                  |
| Allocation concealment mechanism | 9       | Mechanism used to implement the random allocation sequence (such as sequentially numbered containers), describing any steps taken to conceal the sequence until interventions were assigned | 10                  |
| Implementation                   | 10      | Who generated the random allocation sequence, who enrolled participants, and who assigned participants to interventions                                                                     | 10                  |
| Blinding                         | 11a     | If done, who was blinded after assignment to interventions (for example, participants, care providers, those                                                                                | 10                  |

|                                                      |     |                                                                                                                                                   |       |
|------------------------------------------------------|-----|---------------------------------------------------------------------------------------------------------------------------------------------------|-------|
|                                                      |     | assessing outcomes) and how                                                                                                                       |       |
| Statistical methods                                  | 11b | If relevant, description of the similarity of interventions                                                                                       | 5-6   |
|                                                      | 12a | Statistical methods used to compare groups for primary and secondary outcomes                                                                     | 10    |
|                                                      | 12b | Methods for additional analyses, such as subgroup analyses and adjusted analyses                                                                  | 10    |
| <b>Results</b>                                       |     |                                                                                                                                                   |       |
| Participant flow (a diagram is strongly recommended) | 13a | For each group, the numbers of participants who were randomly assigned, received intended treatment, and were analysed for the primary outcome    | 11    |
|                                                      | 13b | For each group, losses and exclusions after randomisation, together with reasons                                                                  | 11    |
| Recruitment                                          | 14a | Dates defining the periods of recruitment and follow-up                                                                                           | 11    |
|                                                      | 14b | Why the trial ended or was stopped                                                                                                                | -     |
| Baseline data                                        | 15  | A table showing baseline demographic and clinical characteristics for each group                                                                  | 12    |
| Numbers analysed                                     | 16  | For each group, number of participants (denominator) included in each analysis and whether the analysis was by original assigned groups           | 11    |
| Outcomes and estimation                              | 17a | For each primary and secondary outcome, results for each group, and the estimated effect size and its precision (such as 95% confidence interval) | 13-15 |
|                                                      | 17b | For binary outcomes, presentation of both absolute and relative effect sizes is recommended                                                       | -     |
| Ancillary analyses                                   | 18  | Results of any other analyses performed, including subgroup analyses and adjusted analyses, distinguishing pre-specified from exploratory         | -     |
| Harms                                                | 19  | All important in each group (for specific guidance see CONSORT for harms)                                                                         | 11    |
| <b>Discussion</b>                                    |     |                                                                                                                                                   |       |
| Limitations                                          | 20  | Trial limitations, addressing sources of potential bias, imprecision, and, if relevant, multiplicity of analyses                                  | 15-16 |
| Generalisability                                     | 21  | Generalisability (external validity, applicability) of the trial findings                                                                         | 16    |
| Interpretation                                       | 22  | Interpretation consistent with results, balancing benefits and harms, and considering other relevant evidence                                     | 15-16 |
| <b>Other information</b>                             |     |                                                                                                                                                   |       |
| Registration                                         | 23  | Registration number and name of trial registry                                                                                                    | 4     |
| Protocol                                             | 24  | Where the full trial protocol can be accessed, if available                                                                                       | -     |
| Funding                                              | 25  | Sources of funding and other support (such as supply of drugs), role of funders                                                                   | 7     |

\*We strongly recommend reading this statement in conjunction with the CONSORT 2010 Explanation and Elaboration for important clarifications on all the items. If relevant, we also recommend reading CONSORT extensions for cluster randomised trials, non-inferiority and equivalence trials, non-pharmacological treatments, herbal interventions, and pragmatic trials. Additional extensions are forthcoming: for those and for up to date references relevant to this checklist, see [www.consort-statement.org](http://www.consort-statement.org).
